# Supplementary material for: Fusion and Patient-reported Outcomes of Minimally Invasive Sacroiliac Joint Fusion Surgery: A Meta-Analysis
Source: Research Square preprint supplement (doi:10.21203/rs.3.rs-7402569/v1), 2025-09-22
Supplement: Supplementary file 1 [file 160bb698f29e5ff00efccda8.docx]

**Table 2: GRADE Analysis**

| **Intervention/ Outcome** | **Patient Population (Study type)** | **Pooled Estimates (95% CI)** | **GRADE** | | | | | |
| --- | --- | --- | --- | --- | --- | --- | --- | --- |
| **Risk of Bias** | **Publication Bias** | **Imprecision** | **Inconsistency** | **Indirectness** | **Quality of Evidence (GRADE)** |
| **SIJF** | | | | | | | | |
| **Fusion Rate** | 852 (10 Case Series and 1 RCT) | 0.86 [0.78, 0.91] | Serious limitations | Likely | No serious imprecision | Very serious inconsistency | No Serious Indirectness | Very low ⊕○○○ |
| **VAS** | 1,911 (24 Case Series, 1  Comparative Cohort, 1 Prospective Single Cohort, 4 RCT) | -4.90 [-5.49, -4.30] | Serious limitations | Likely | No serious imprecision | No serious inconsistency | No Serious Indirectness | Moderate ⊕⊕○○ |
| **ODI** | 1,833 (18 Case Series, 2  Comparative Cohort, 1 Prospective Single-Cohort, 4 RCT) | -22.01 [-27.90, -16.12] | Serious limitations | Likely | No serious imprecision | Serious inconsistency | No Serious Indirectness | Very low ⊕○○○ |
| **SIJF vs. Conservative** | | | | | | | | |
| **VAS** | 314 vs. 282 (4 RCTs, 1  Comparative Cohort) | -3.56 [-4.64, -2.48] | Serious limitations | Very Likely | No serious imprecision | Very serious inconsistency | No Serious Indirectness | Very low ⊕○○○ |
| **ODI** | 314 vs. 282 (4 RCTs, 1  comparative cohort) | -13.80 [-21.51, -6.08] | Serious limitations | Very Likely | No serious imprecision | Very serious inconsistency | No Serious Indirectness | Very low ⊕○○○ |
| **Subgroup Analyses** | | | | | | | | |
| **Fusion Rate by Device** | **IFuse:** 339 (3 Case  Series, 1 RCT) | 0.89 [0.82, 0.94] | Serious limitations | Likely | No serious imprecision | Serious inconsistency | No Serious Indirectness | Very low ⊕○○○ |
| **Rialto/SI-lok/Integrity:**  226 (4 Case Series) | 0.86 [0.71, 0.94] | Serious limitations | Likely | No serious imprecision | Very serious inconsistency | No Serious Indirectness | Very low ⊕○○○ |
| **SImmetry:** 287 (3 Case Series) | 0.75 [0.61, 0.85] | Serious limitations | Likely | No serious imprecision | No serious inconsistency | No Serious Indirectness | Very low ⊕○○○ |
| **VAS by MINORS** | **Below Cutoff:** 395 (8 Case Series) | -5.08 [-6.13, -4.03] | Serious limitations | Likely | No serious imprecision | No serious inconsistency | No Serious Indirectness | Very low ⊕○○○ |
| **Above Cutoff:** 1,229 (16  Case Series, 1  Comparative Cohort, 1 Prospective Single Cohort) | -4.89 [-5.68, -4.10] | No serious limitations | Likely | No serious imprecision | No serious inconsistency | No Serious Indirectness | Moderate ⊕⊕○○ |
| **ODI by MINORS** | **Below Cutoff:** 213 (4 Case Series) | -28.41 [-37.21, -19.61] | Serious limitations | Likely | No serious imprecision | No serious inconsistency | No Serious Indirectness | Very low ⊕○○○ |
| **Above Cutoff:** 1,332 (14  Case Series, 2  Comparative Cohort, 1 Prospective Single Cohort) | -19.58 [-26.63, -12.52] | No serious limitations | Likely | No serious imprecision | No serious inconsistency | No Serious Indirectness | Moderate ⊕⊕○○ |
