# Supplementary material for: Fusion and Patient-reported Outcomes of Minimally Invasive Sacroiliac Joint Fusion Surgery: A Meta-Analysis
Source: Research Square preprint supplement (doi:10.21203/rs.3.rs-7402569/v1), 2025-09-22
Supplement: Supplementary file 2 [file a282b60e7c0dc1780301fd17.docx]

**Table 1: Study and Demographic Characteristics**

|  | **Study Period** | **Country** | **Study design** | **Implant Type** | **N** | **Age (Mean** *±* **SD, range)** | **Female Sex**  **n (%)** | **BMI** | **Smokin g n (%)** | **Previous Lumbar Surgery n (%)** | **Outcomes Reported** | **Follow-up Interval (m)** | **Funding Source** | **Adverse Outcomes (%)** |
| --- | --- | --- | --- | --- | --- | --- | --- | --- | --- | --- | --- | --- | --- | --- |
| **Abbasi et al., 2021**⁶ | 2015-  2020 | USA | Case series | Zyga, LnK,  Corelink | 78 | 54.0 ± 14.4 | NR | 33.4 | NR | NR | ODI | 12 | None | Reoperation: 1 (1.6%)  Pseudoarthrosis: 5  (8.1%)  Hematoma: 1 (1.6%) |
| **Agarwal et al., 2024ef** | 2013-  2018 | United Kingdom | Prospec tive compar ative  cohort | HACS  vs TTD | 94  HACS: 33 TTD: 61 | HACS: 55.0 ± 12  TTD: 50.0 ± 12 | HACS: 26  (78.8)  TTD: 48  (78.7) | NR | NR | NR | ODI, EQ5D5L, MPS,  SF-36 | 12 | None | NR |
| **Amer et al., 2022** | 2019-  2021 | United Kingdom | Case series | iFuse | 20 | 49.6 ± 14.5 | 15 (75.0) | 28.4 | NR | 7 (35.0) | VAS, ODI, SF-36 | 20 | None | Reoperation: 2 (10%)  Pseudoarthrosis: 2  (10%)  Implant Malposition: 3 (15%) |
| **Anton et al., 2023** | 2018-  2021 | USA | Case series | Rialto | 118 | 58.56 ± 13.12 | 81 (68.6) | 29.9 | 19  (16.1) | 60  (50.8) | Fusion rate, VAS,  ODI | 12 | None | Reoperation: 2 (1.7%)  Pseudoarthrosis: 2  (1.7%) |
| §**Bornema nn et al.,**  **2017³**⁵ | NR | Germany | Case series | iFuse | 24 | 54.9 | 22 (91.7) | NR | NR | NR | ODI, VAS | 24 | None | NR |
| **Calodney et al., 2024** | 2020-  2022 | USA | Prospec tive single cohort | LinQ | 117 | 59.0 ± 9.8 | 82 (70.1) | 30.3 | NR | NR | VAS, ODI, PROMIS- 29 | 12 | PainTEQ | Increased Pain: 1  (0.85%) |
| **†Capobian co et al., 2015**⁷ | NR | USA | Case series | iFuse | 172 | 52.5 ± 11.1 | 120 (69.8) | 28.7 | NR | 6 (3.5) | ODI, VAS, SF-36 | 12 | None | Infection: 4 (2.3%)  Reoperation: 4 (2.3%)  Hematoma: 1 (0.58%)  Increased Pain: 2  (1.2%)  Implant Malposition: 1 (0.58%) |
| **Claus et al., 2020***ab* **¹**⁵ | 2012-  2018 | USA | Case series | Rialto vs iFuse | 156  Rialto:74  SI-Bone: 82 | Rialto: 58.4  (23-82)  SI-Bone: 55.7  (27-85) | Rialto: 54  (73.0)  SI-Bone: 60  (73.2) | NR | NR | 99 (63.5) | ODI, VAS, SF-12 PCS | 12 | None | Hematoma: 8 (5.1%) |
| **Cleveland et al., 2019¹**⁰ | 2011-  2016 | USA | Case series | iFuse | 57 | 51.0 ± 13.4 | 43 (75.4) | 29.2 | NR | NR | ODI, VAS | 22 | None | Infection: 1 (1.8%)  Hematoma: 1 (1.8%) |
| **Cross et al., 2018³**⁶ | NR | USA | Case series | SImm etry | 19 | 60.1 ± 13.7 | 15 (79.0) | 29.1 | 3(15.7) | NR | Fusion rate, VAS | 12 | Zyga Technology, Inc | NR |
| **Cross et al., 2024** | 2017-  2019 | USA | Case series | Integrity | 75 | 58.0 ± 14.6 | 45 (60.0) | 29.0 | 2 (3.3) | NR | NRS, ODI, SANE, PROMIS- 10,  Fusion Rate | 14.2 | None | Reoperation: 1 (1.3%) Implant Malposition: 1 (1.3%) |
| **Cummings et al 2013** | 2011-  2012 | USA | Case series | iFuse | 18 | 64.0 ± 12.2 | 12 (67.0) | 31 | 2 (11.1) | 15 (83.3) | ODI, VAS, SF-12 PCS,  SF-12 MCS | 12 | None | Hematoma: 1 (5.5%) Implant Malposition: 1 (5.5%) |
| **Dengler et al., 2019³**⁴ | 2013-  2015 | Germany,  Italy, Belgium, Sweden | RCT | iFuse | 103  SIJF: 52  CT: 51 | SIJF: 49.4 (21-70)  CT: 46.7 (23-69) | SIJF: 38  (73.1)  CT: 37  (72.5) | 27.5 | 39  (37.9) | 37  (35.9) | ODI, VAS,  EQ-5D,  Fusion Rate | SIJF: 24  CT: 6 | SI-BONE | Hematoma: 1 (1.9%)  Increased Pain: 2  (3.8%) |
| **Duhon et al., 2016³**⁷ | 2012-  2013 | USA | Case series | iFuse | 172 | 50.9 (23-72) | 120 (69.8) | 29.4 | 44(25.  6) | 76  (44.2) | Fusion Rate, ODI, VAS, SF-36 PCS,  SF-36 MCS | 24 | SI-BONE | Infection: 6 (3.5%)  Pseudoarthrosis: 17  (10%)  Hematoma: 1 (0.58%)  Increased Pain: 5  (2.9%)  Implant Malposition: 3 (1.7%) |

| **Harvey et al., 2015** ⁴**¹ (Polly 2015)** | 2013-  2014 | USA | RCT | iFuse | 148  SIJF: 102  CT: 46 | SIJF: 50.2 ± 11.4  CT: 53.8 ± 10.6 | SIJF: 75  (73.5)  CT: 28  (60.9) | 30.4 | 26  (17.6) | 40 (27.0) | ODI, VAS, SF-36 PCS,  SF-36 MCS, EQ-5D | 12 | SI-BONE | Infection: 4 (3.9%)  Reoperation: 1 (1%)  Increased Pain: 5  (4.9%)  Implant Malposition: 1 (1%) |
| --- | --- | --- | --- | --- | --- | --- | --- | --- | --- | --- | --- | --- | --- | --- |
| *††***Kancher la et al., 2017** | 2012-  2014 | USA | Case series | iFuse | 45 | 52.7 ± 12.1 | 31 (68.9) | 28.6 | 9(20.0) | 16(35.6) | ODI, VAS, SF-12 PCS,  SF-12 MCS | 32.6 | None | Implant Malposition: 3 (6.7%) |
| **Kasapovic**  **et al., 2022** | NR | Germany | Case  series | Torpe  do | 15 | *¶*59.0 ± 13 | 10 (66.7) | NR | NR | NR | NRS, ODI | 6 | None | NR |
| **Kube et al., 2016²**⁸ | 2011-  2014 | USA | Case series | SImm etry | 18 | 47.2 ± 14.2 | 10 (56.0) | 29.4 | 10(55.6) | 8 (44.4) | ODI, VAS,  Fusion Rate | 12 | None | Increased Pain: 1  (5.6%) |
| *††***Kucharz yk et al., 2022** | NR | USA | Case series | SImm etry | 201 | 60.5 ± 12.8 | 177 (88.1) | 30.1 | NR | 92  (36.8) | VAS, ODI, EQ-5D,  Fusion rate | 12 | Surgalign Spine Technology | Reoperation: 2 (1%)  Pseudoarthrosis: 1  (0.5%)  Hematoma: 1 (0.5%)  Increased Pain: 1  (0.5%)  Implant Malposition: 1 (0.5%) |
| **Ledonio et**  **al., 2014** | 2006-  2011 | USA | Case  Series | iFuse | 22 | 47.9 ± 13.1 | 17 (77.3) | 30.5 | NR | 14(63.6) | ODI | 12 | None | Reoperation: 2 (4.5%) |
| **Lynch et al., 2022** | NR | USA | Case series | PsiF | 57 | 63.0 ± 15 | NR | NR | NR | NR | NRS,  Pain-toler ant Walking/ standing Time | 6 | Omnia Medical | NR |
| **Mohit et al., 2020** | 2013-  2017 | USA | Case series | SI-Lok | 44 | 69.0 ± 9 | 29 (65.9) | 31 | 2(4.5) | 41(93.2) | ODI, VAS | 24 | Musculoskel etal Education and Research Center  (MFRC) | Hematoma: 1 (2.1%) |
| *††*§**Patel et al., 2021** | 2017-  2019 | USA | Prospec tive single cohort | 3D-pri nted TTI | 51 | 53.0 | 39 (76.5) | NR | NR | NR | ODI, VAS,  EuroQOL- 5D | 24 | SI-BONE | Reoperation: 2 (3.9%)  Increased Pain: 1  (2%)  Implant Malposition: 1 (2%) |
| **Polly et al., 2016¹**⁵ | 2013-  2014 | USA | RCT | iFuse | 145  SIJF:1 01  CT: 44 | SIJF: 50.2 ± 11.4  CT: 53.8 ± 10.6 | SIJF: 75  (73.5)  CT: 28  (60.9) | 30.4 | 26  (17.6) | 41  (27.7) | ODI, VAS | 6 | SI-BONE | Infection: 2 (1.9%)  Reoperation: 3 (2.9%)  Hematoma: 1 (1%)  Increased Pain: 9  (8.8%) |
| **Raikar et al., 2023** | 2020-  2022 | USA | Case series | Sacrix | 19 | 58.0 (44-84) | 17 (89.5) | NR | NR | 11  (57.9) | NRS,  Function al Improve ment, Radiogra phic fusion w XR | 12 | None | NR |
| **Rainov et al., 2019³**⁸ | 2015-  2017 | Germany | Case series | iFuse | 160 | 58.0 (20-91) | 108 (67.5) | NR | NR | 102  (63.8) | ODI, VAS, SF-36 PCS,  SF-36 MCS, EQ05D,  Fusion Rate | 12 | None | Hematoma: 25  (15.6%) |
| **Rajpal et**  **al. 2019** | 2015-  2017 | USA | Case  series | Rialto | 24 | 62.2 (33-79) | 21 (87.5) | NR | NR | 15(62.5) | VAS | 34 | None | Infection: 2 (8.3%)  Hematoma: 2 (8.3%) |

| **Randers et al., 2024c** | 2018-  2021 | Sweden & Norway | RCT | iFuse | 63  SIJF: 32 CT:  31 | SIJF: 45.3 (29-60)  CT: 44.3 (26-63) | SIJF: 29  (91.0)  CT: 30  (97.0) | 27.0 | 2 (6.0) | NR | NRS, ODI, PGQ,  EQ-5D, 6  min walking test | 6 | Sophies Minde Ortopedi & Region Stockholm | Infection: 1 (3.1%)  Hematoma: 1 (3.1%)  Increased Pain: 1  (3.1%) |
| --- | --- | --- | --- | --- | --- | --- | --- | --- | --- | --- | --- | --- | --- | --- |
| **Randers et al., 2024d** | 1998-  2020 | Sweden | Case series | iFuse | 68 | 45.0 (25-70) | 59 (86.7) | 25.3 | 2 (3.0) | NR | ODI, NRS, EQ-VAS | 24 | Sophies Minde Ortopedi & Center of Innovative Medicine  (CIMED | Infection: 1 (1.5%)  Reoperation: 3 (4.4%) Implant Malposition: 3 (4.4%) |
| **Rappoport et al., 2021³**⁹ | 2013-  2018 | USA | Case series | SI-LO K | 32 | 55.2 ± 10.7 | 20 (62.5) | NR | NR | NR | VAS, ODI,  Fusion Rate | 24 | Globus Medical, Inc | Reoperation: 2 (6.3%) |
| **Rudolf et al., 2012** | 2007-  2010 | USA | Case series | iFuse | 45 | 54.0 (24-85) | 34 (68.0) | NR | NR | 22(48.9) | VAS | 40 | None | Infection: 4 (8%)  Reoperation: 3 (6%  Hematoma: 2 (4%)  Increased Pain: 1  (2%)  Implant Malposition: 2 (4%) |
| *††***Sarkar et al., 2022** | 2017-  2020 | India | Case series | Rialto | 43 | 66.0 ± 14 | 27 (62.8) | 25.3 | NR | 14 (33.0) | VAS,  Fusion rate | 13 | None | Reoperation: 2 (4.7%) |
| **Schmidt et al., 2021** | 2013-  2015 | USA | Case series | iFuse | 24 | 50.0 (44-52) | 4 (21.1) | NR | NR | NR | VAS, SF-36 PCS | 58 | None | NR |
| **Smith et al, 2013** | 1994-  2012 | USA | Case series | iFuse | 114 | 57.4 ± 14.0 | 82 (71.9) | NR | NR | 54(47.4) | VAS | 24 | None | Infection: 4 (3.5%)  Hematoma: 2 (1.7%) |
| *‡‡***Vanaclo cha et al., 2018** | 2007-  2015 | Spain | Retrospective comparative cohort | iFuse | 137  SIJF: 27 CT: 110 | SIJF: 48.0 (25-69)  CT: 49.7 (24-70) | SIJF: 19  (70.4)  CT: 61  (55.2) | 29.5 | 11(8.0) | 2(1.5) | ODI, VAS | 6 | None | NR |
| **Wales et al., 2021** | 2013-  2015 | United Kingdom | Case series | SI-LO K | 40 | 55.5 (33-84) | 32 (80.0) | NR | NR | NR | ODI, SF-36 PCS, SF-36 MCS | 12 | None | NR |
| **Whang et al., 2019** ⁴⁰ | NR | USA | Case series | iFuse | 111 | 50.8 ± 10.8 | 75 (72.8) | 31 | 19  (18.4) | 46  (44.7) | VAS, ODI,  Fusion Rate | 60 | SI-BONE | Reoperation: 4 (3.9%)  Increased Pain: 34  (33%) |
| **Wise et al., 2008²**⁷ | 2004 | USA | Case series | Rialto | 13 | 53.1 (45-62) | 12 (92.3) | 31.2 | NR | 8 (61.5) | VAS,  Fusion Rate | 6 | None | NR |

*RCT, randomized controlled trial; CT , conservative treatment; SIJ, sacroiliac joint; BMI, body mass index; SIJF, Sacroiliac joint fusion:; EQ-5D/EuroQol-5D/EQ-5D-5L, European Quality of Life-5 Dimensions/5 Dimensions-5 Levels; MPS, Majeed Pelvic Score; SF-12/36, short-form 12/36 item; PCS/MCS, physical component scale/mental component scale; VAS, Visual Analog Scale; ODI, Oswestry Disability Index; PROMIS, Patient-Reported Outcomes Measurement Information System; NRS, Numeric Rating Scale; SANE, Single Assessment Numerical Evaluation; PGQ, Pelvic Girdle Questionnaire; EQ-VAS, European Quality of Life-Visual Analogue Scale; NR, not reported; XR, x-ray; HACS, hydroxyapatite-coated screws; TTD, titanium triangular dowels*

*Categorical data are presented as n (%); continuous data are presented as mean ± SD, ¶median with range and interquartile range (IQR) when appropriate*

*ODI was assessed with a denominator of 100.*

*VAS is VAS-Back*

*Claus et al. 2020 was split into two groups: Clausa. Rialto group; Clausb. SI-Bone group.*

*Randers et al. published two studies in 2024: Randerse RCT; Randersf cohort study.*

*Agarwal et al. 2024 was split into two groups: Agarwale HACs (hydroxyapatite-coated screws) group; Agarwalf TTD (titanium triangular dowels) group.*

§: standard deviation or range was not provided

*† Capobianco: Only patients without PPGP (postpartum pelvic girdle pain) group was included*

*†† Studies did not provide sufficient information to analyze VAS and/or ODI scores and/or fusion rate*

*‡‡ Vanaclocha: Follow-up data was extracted from Hermans et al. 2022 meta-analysis, in which SI denervation and CT groups were combined as CT group. Harvey 2015: data was from manuscript supplemental data, but we did not include the cross over group*

*Polly 2016: We contacted the authors to obtain raw data*
