# Supplementary material for: Fusion and Patient-reported Outcomes of Minimally Invasive Sacroiliac Joint Fusion Surgery: A Meta-Analysis
Source: Research Square preprint supplement (doi:10.21203/rs.3.rs-7402569/v1), 2025-09-22
Supplement: Supplementary file 3 [file b3774716d917aae35f4fdd07.docx]

**Supplementary File: Expanded Search of Studies**

**PubMed Search**

**7/29/2021**

(Sacroiliac joint fusion OR sacroiliac joint arthrodesis OR minimally invasive sacroiliac joint fusion OR minimally invasive sacroiliac joint arthrodesis OR SIJ fusion OR SIJ arthrodesis OR MIS SIJ fusion OR MIS SIJ arthrodesis)

Filters: 1/1/1946-7/29/2021 (none)

Results: 527

Filters: 1/1/2000-7/29/2021, English language

Results: 414

**7/17/2024**

Filters: None

Results: 732

Filters: 7/30/2021 - 7/17/2024, no other filter

Results: 223

Filters: 7/30/2021 - 7/17/2024, English language

Results: 221

***Found Patel 2021 (SALLY study) on 7/29/24 when completing the new full-text review, added to new full-text review in Zotero (step 4) —> will replace Patel 2019 (already included in study)

**EMBASE Search**

**7/30/2021**

((((((sacroiliac AND ('joint' OR 'joint'/exp OR joint) AND ('fusion' OR 'fusion'/exp OR fusion) OR sacroiliac) AND ('joint' OR 'joint'/exp OR joint) AND ('arthrodesis' OR 'arthrodesis'/exp OR arthrodesis) OR minimally) AND invasive AND sacroiliac AND ('joint' OR 'joint'/exp OR joint) AND ('fusion' OR 'fusion'/exp OR fusion) OR minimally) AND invasive AND sacroiliac AND ('joint' OR 'joint'/exp OR joint) AND ('arthrodesis' OR 'arthrodesis'/exp OR arthrodesis) OR sij) AND ('fusion' OR 'fusion'/exp OR fusion) OR 'mis'/exp OR mis) AND sij AND ('fusion' OR 'fusion'/exp OR fusion) OR 'mis'/exp OR mis) AND sij AND ('arthrodesis' OR 'arthrodesis'/exp OR arthrodesis)

Filters: None

Results: 131

Filters: 1/1/2000-7/29/2021, English language

Results: 122

**7/17/2024**

Filters: None

Results: 221

Filters: 1/1/2021 - 7/17/2024, English language

Results: 98

Filters: 7/30/2021 - 7/17/2024, no other filter

Results: 97

Filters: 7/30/2021 - 7/17/2024, English language

Results: 96

**Cochrane Search**

**7/29/21**

Sacroiliac joint fusion OR sacroiliac joint arthrodesis OR minimally invasive sacroiliac joint fusion OR minimally invasive sacroiliac joint arthrodesis OR SIJ fusion OR SIJ arthrodesis OR MIS SIJ fusion OR MIS SIJ arthrodesis

Filters: None

Results: 67

Filters: 2000-2021, Trials

Results: 46

**7/17/2024**

Filters: None

Results: 63

Filters: 1/1/2021 - 7/17/2024, English language

Results: 17

Filters: 7/30/2021 - 7/17/2024, no other filter

Results:

Filters: 7/30/2021 - 7/17/2024, English language

Results: 15
